# Supplementary figures and images for: The Multi-Kinase Inhibitor EC-70124 Is a Promising Candidate for the Treatment of FLT3-ITD-Positive Acute Myeloid Leukemia
Source: MDPI journal article supplement (doi:10.3390/cancers14061593), 2022-03-21

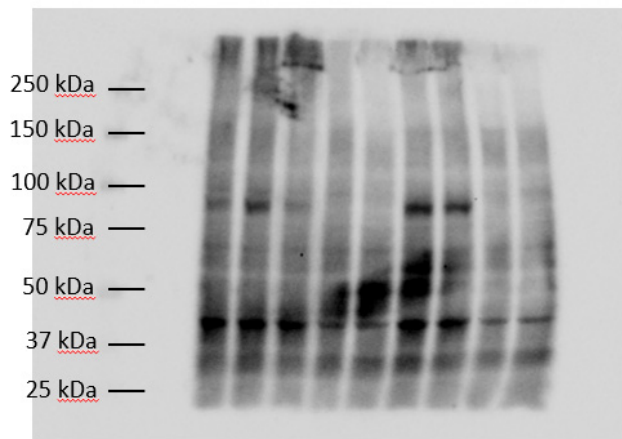

**pStat**

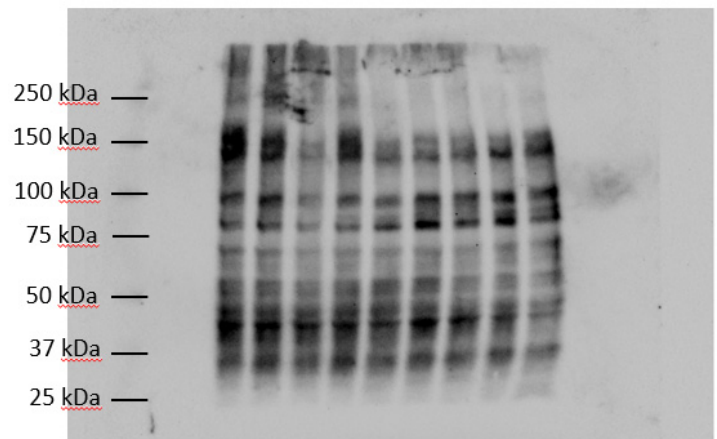

**Stat**

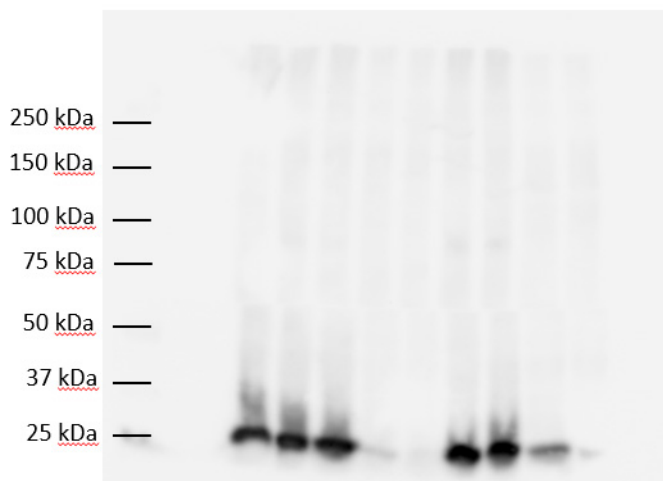

**pS6**

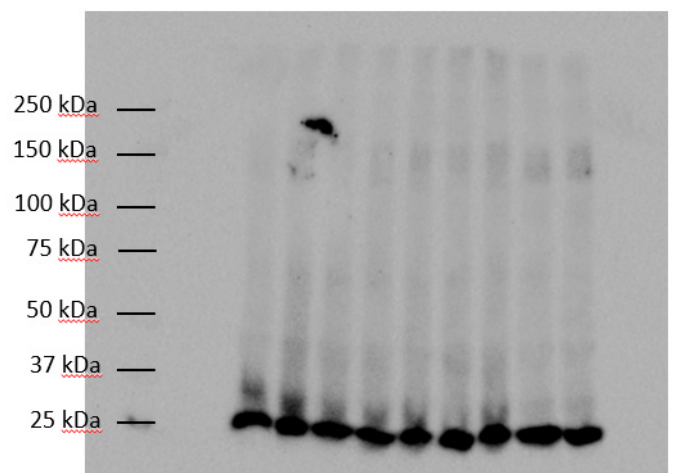

**S6**

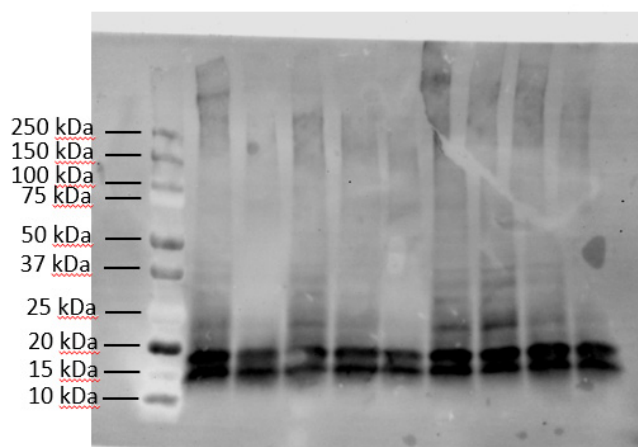

**pBad**

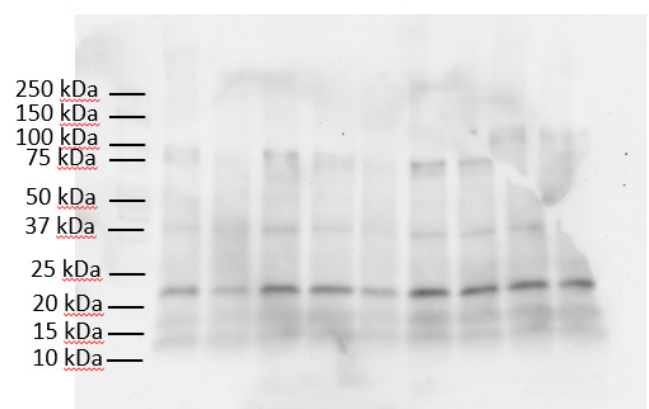

**Bad**

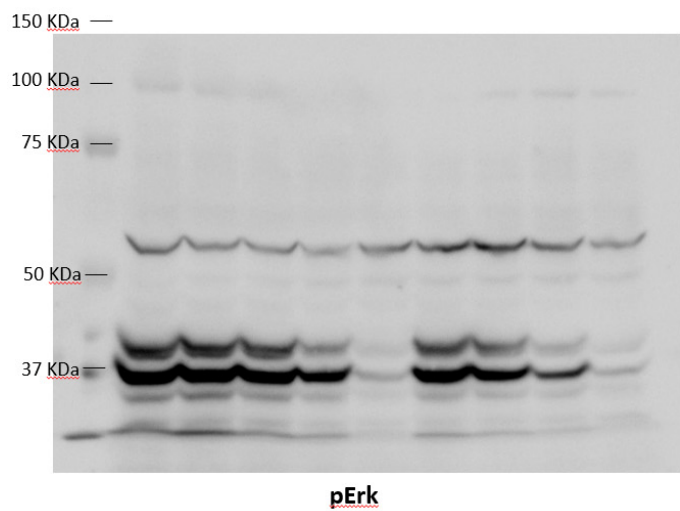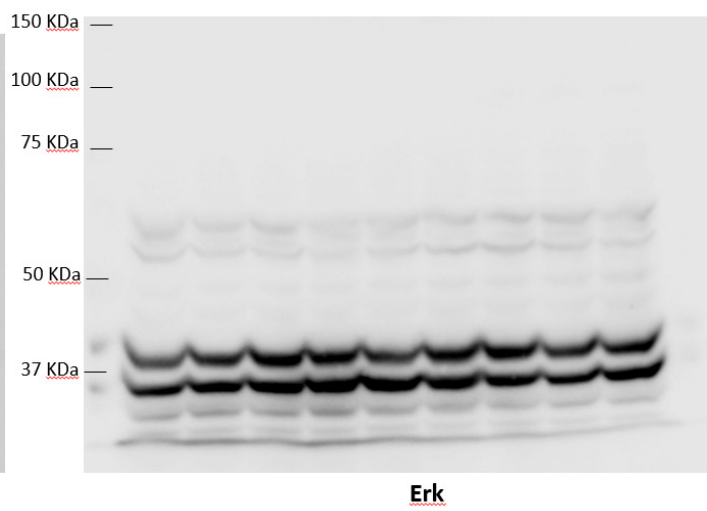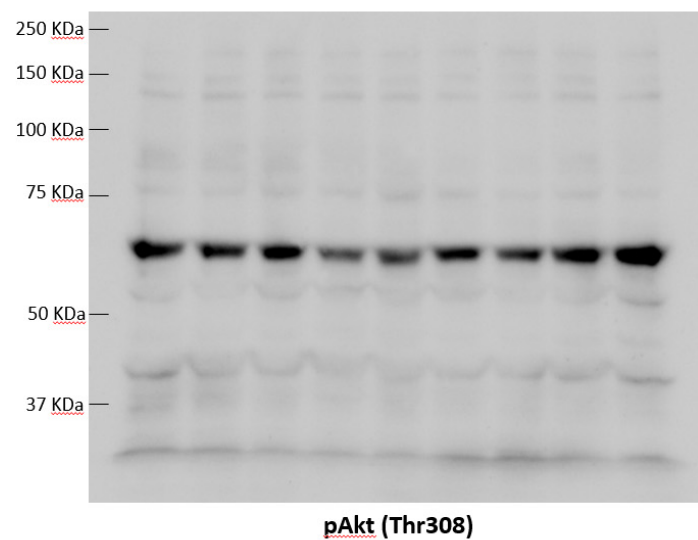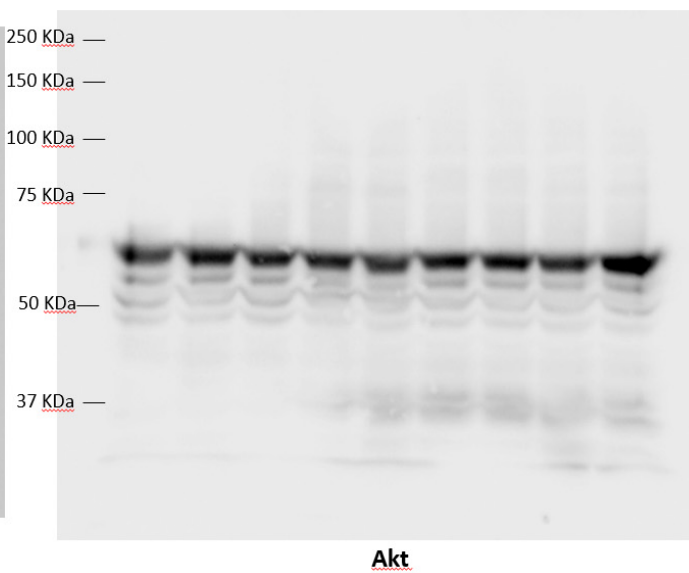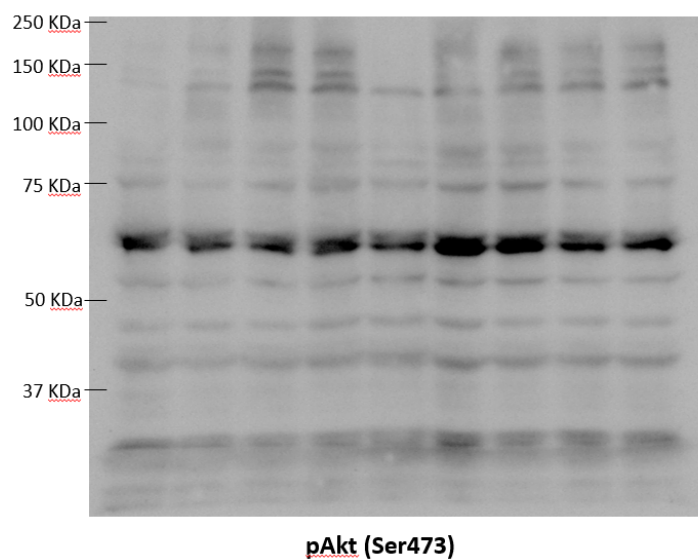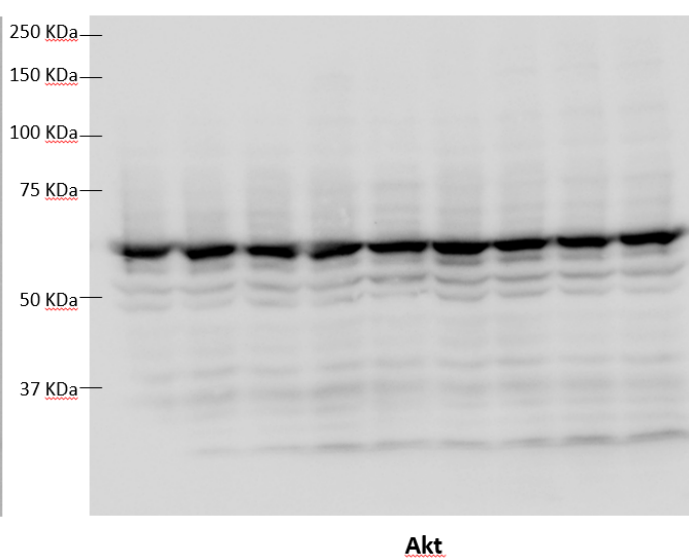

Figure S1. Uncropped blots.

Supplement: s1 [file s1]
